# Supplementary material for: Highly regioselective 1,3-dipolar cycloaddition of diphenylnitrilimine to Sc3N@Ih-C80 affording a very stable, unprecedented pyrazole-ring fused derivative of endohedral metallofullerenes
Source: Royal Society of Chemistry journal article supplement (doi:10.1039/c4cc06134a), 2014-01-01
Supplement: c4cc06134a1.pdf [file c4cc06134a1.pdf]

# Highly regioselective cycloaddition of diphenylnitrilimine to $\text{Sc}_3\text{N}@I_h\text{-C}_{80}$ affording a very stable, unprecedented pyrazole-ring fused derivative of endohedral metallofullerenes

Bin Liu,<sup>a#</sup> Hailin Cong,<sup>b#</sup> Xiaofang Li,<sup>\*a</sup> Bing Yu,<sup>b</sup> Lipiao Bao,<sup>c</sup> Wenting Cai,<sup>c</sup> Yunpeng Xie<sup>c</sup> and Xing Lu<sup>\*c</sup>

<sup>a</sup> Key Laboratory of Theoretical Chemistry and Molecular Simulation of Ministry of Education, Hunan Province College Key Laboratory of QSAR/QSPR, School of Chemistry and Chemical Engineering, Hunan University of Science and Technology, Xiangtan, Hunan 411201, China

<sup>b</sup> Lab for New Fiber Materials and Modern Textile-Growing Base for State Key Laboratory, College of Chemical and Environmental Engineering, Qingdao University, Qingdao, 266071, China.

<sup>c</sup> State Key Laboratory of Materials Processing and Die & Mold Technology, School of Materials Science and Engineering, Huazhong University of Science and Technology (HUST), Wuhan 430074, China.; E-mail: [lux@hust.edu.cn](mailto:lux@hust.edu.cn)

## Experimental details

### General considerations.

All the commercial reagents were used without further purification except o-dichlorobenzene for the reaction which was freshly distilled before use.  $\text{Sc}_3\text{N}@I_h\text{-C}_{80}$  were produced with acr-discharge method and isolated with HPLC. Analytical and preparative HPLC were performed on different Buckyprep columns ( $\varnothing 10 \times 250$  mm or  $\varnothing 20 \times 250$  mm, Cosmosil), respectively. Toluene was used as eluent. NMR spectra were recorded on a Bruker AV-II 500 MHz NMR spectrometer, locked on deuterated solvents and referenced to the solvent peak. Matrix-assisted laser desorption-ionization time-of-flight (MALDI-TOF) mass spectra were recorded with a Biflex III (Bruker Daltonics Inc., Germany) mass spectrometer using 1,1,4,4-tetraphenyl-1,3-butadiene as matrix in a positive ion linear mode. The UV-vis experiments were carried out on a PE Lambda 750S UV-vis-NIR spectrophotometer.

### Synthesis of the pyrazole-ring fused derivative 2.

To a 40 ml o-dichlorobenzene solution containing 5.0 mg  $\text{Sc}_3\text{N}@I_h\text{-C}_{80}$  (4.6  $\mu\text{mol}$ , 1 eq) and 5.3 mg N<sup>1</sup>-phenylbenzohydrazonoyl chloride (23  $\mu\text{mol}$ , 5 eq) was added triethylamine (50  $\mu\text{l}$ ), and the reaction mixture were stirred at 120°C under argon for 5h. The reaction progress was followed with HPLC on a semi-preparative Buckyprep column ( $\varnothing 10 \times 250$  mm, Cosmosil). Then, the solvent was evaporated and the solid residue was dissolved in  $\text{CS}_2$  and subjected to silica gel column chromatography. The polarity of the eluant was increased from  $\text{CS}_2$  to toluene, which allows separation of the unreacted  $\text{Sc}_3\text{N}@I_h\text{-C}_{80}$ . The eluant of 1:1  $\text{CS}_2$ /toluene gave the desired product **2** which was

further purified by HPLC using a Buckyprep column ( $\phi 20 \times 250$  mm, Cosmosil) with 8.0 mL/min toluene flow rate. After evaporation, 2.5 mg of the product **2** was obtained (38% isolated yield).

$^1\text{H}$  NMR (500 MHz,  $\text{CS}_2/\text{C}_3\text{D}_6\text{O}=4:1$ , 298K)  $\delta_{\text{H}} = 6.36$  (d,  $J=7.5$  Hz, 1H), 6.44 (t,  $J=7.5$  Hz, 1H), 6.50 (t,  $J=7.5$  Hz, 1H), 6.54 (t,  $J=7.5$  Hz, 1H), 6.67 (t,  $J=8.0$  Hz, 2H), 6.73-6.75 (m, 1H), 6.67 (t,  $J=8.0$  Hz, 2H), 6.78 (t,  $J=8.5$  Hz, 2H), 7.39 (d,  $J=6.5$  Hz, 2H).

MS (MALDI-TOF):  $m/z = 1303$   $[\text{M}+\text{H}]^+$ ; Calcd for  $\text{Sc}_3\text{C}_{120}\text{H}_{21}\text{F}_{10}\text{N}_6$ :  $m/z = 1303$ .

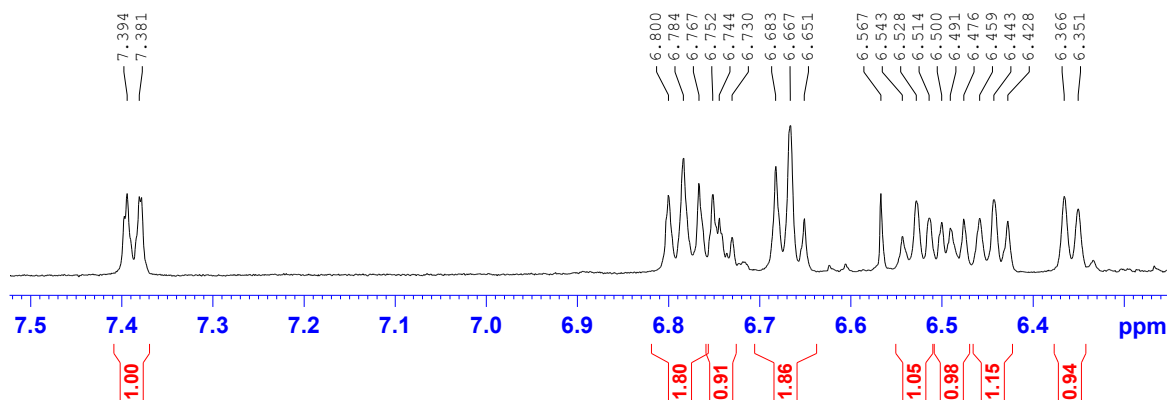

**Figure S1.**  $^1\text{H}$  NMR spectrum of **2**, 298 K,  $\text{C}_3\text{D}_6\text{O}/\text{CS}_2$ .

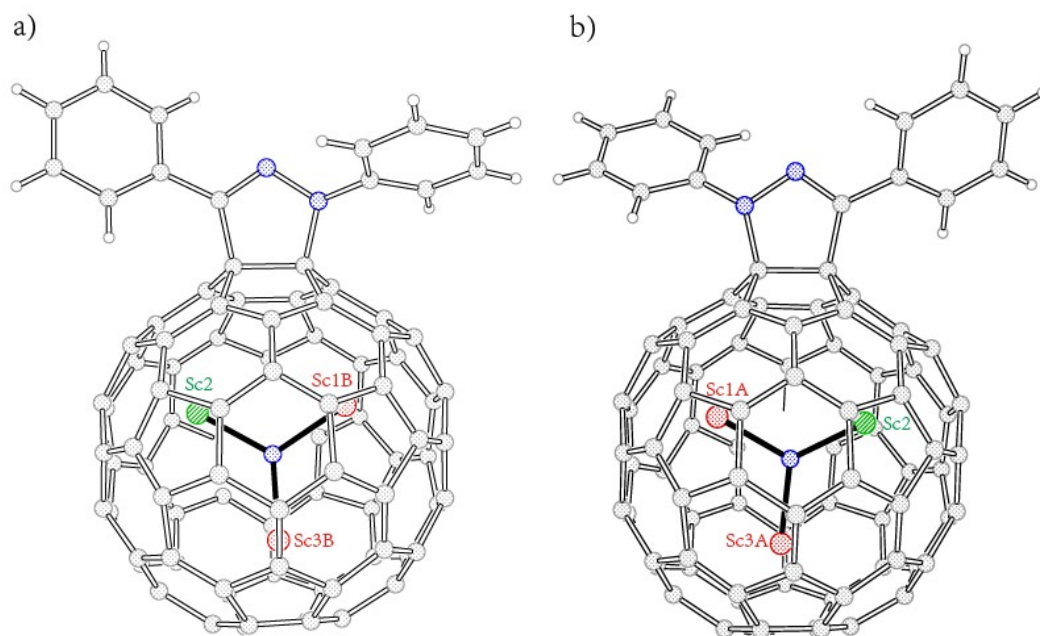

**Figure S2.** Geometric features of **2**. a) minor cage with minor  $\text{Sc}_3\text{N}$  cluster, occupation: 0.33 for the cage and 0.40 for Sc1B & Sc3B, b) major cage with major  $\text{Sc}_3\text{N}$  unit, occupation: 0.67 for the cage and 0.60 for Sc1A & Sc3A.
